# Supplementary material for: Preparation of Improved p-n Junction NiO/TiO2Nanotubes for Solar-Energy-Driven Light Photocatalysis
Source: Hindawi journal article supplement (doi:10.1155/2013/659013), 2013-01-01
Supplement: f1 [file 659013.f1.doc]

**Supplementary Information**

**___________________________________________**

Preparation of improved p-n junction NiO/TiO2 nanotubes for solar –energy- driven photoreaction

*Lan Ching Sim,a Kai Wern Ng,a Shaliza Ibrahim,a Pichiah Saravanan a,b*

*a Environmental Engineering Laboratory, Department of Civil Engineering, Faculty of Engineering, University of Malaya, 50603 Kuala Lumpur, Malaysia*

*b Combinatorial Technologies & Catalysis Research Centre, University of Malaya, 50603 Kuala Lumpur, Malaysia*


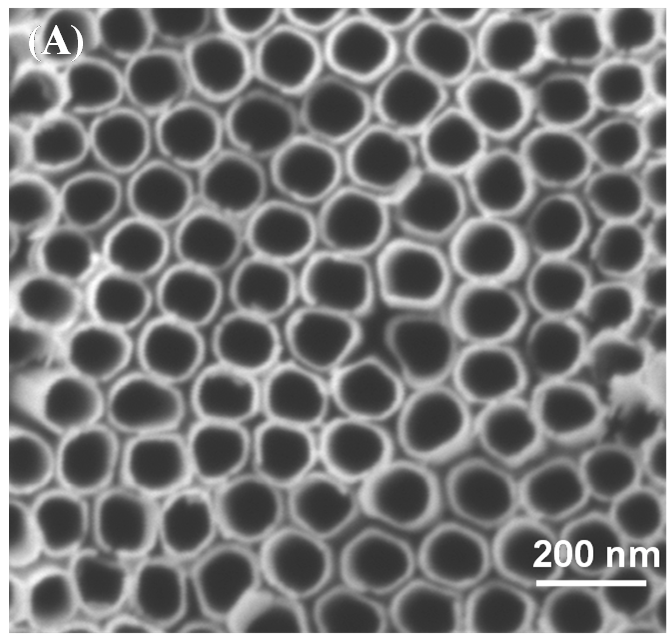


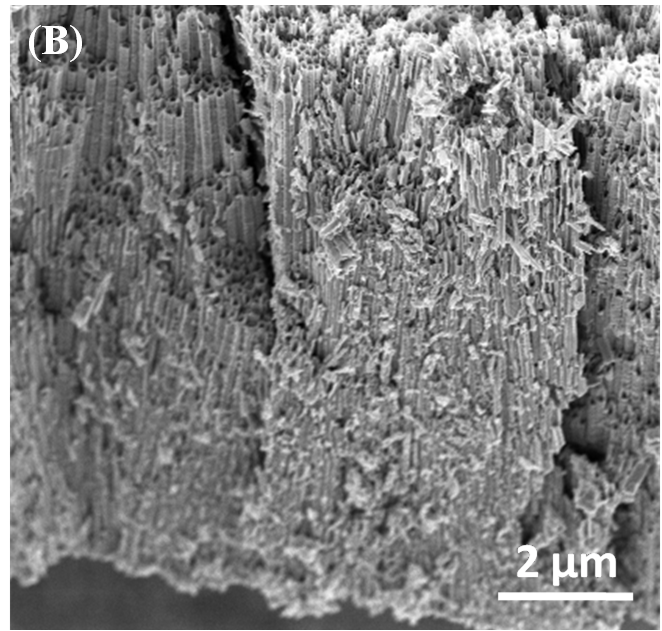


**Figure S1.** (a) FESEM top-view and (b) cross sectional images of NiO/TNTs (2.5 M).


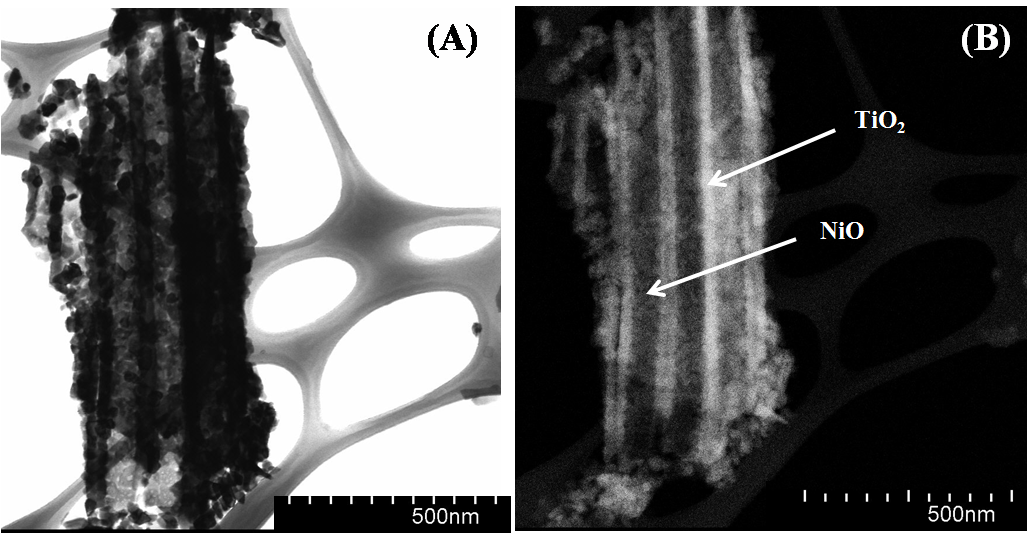


**Figure S2.** (a) STEM (bright-field) image of NiO/TNTs (0.5 M) (b) STEM (dark-field) image of NiO/TNTs (0.5 M).


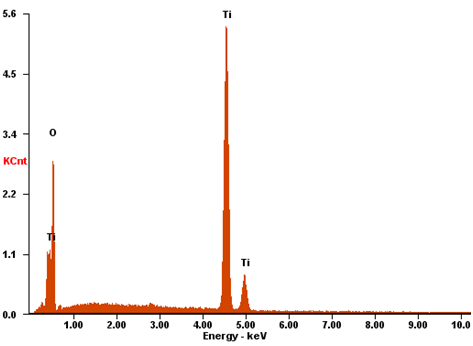


**Figure S3.** (a) EDX of NiO/TNTs (0.5 M) on top openings of nanotubes area.

**Table S1** Surface elemental concentration, Ti, O and Ni species concentration from XPS analysis for NiO/TNTs (0.5 M).
